# Supplementary material for: Mycoplasma haemocanis – the canine hemoplasma and its feline counterpart in the genomic era
Source: PubMed Central journal article supplement (PMC3496576; doi:10.1186/1297-9716-43-66), 2012-09-28
Supplement: 1297-9716-43-66-S1.pdf [file 1297-9716-43-66-S1.pdf]

**Supplementary Table 1. List of paralogous gene families\* in the genome of *Mycoplasma haemocanis* strain Illinois.**

Family 1, 514 genes

---

AEW45559.2  
AEW45549.1  
AEW45199.2  
AEW45473.1  
AEW45478.1  
AEW45444.1  
AEW45834.1  
AEW45488.1  
AEW45805.1  
AEW45112.1  
AEW45744.1  
AEW45156.1  
AEW45438.1  
AEW45441.1  
AEW45547.1  
AEW45111.2  
AEW45137.1  
AEW45202.2  
AEW45116.1  
AEW45120.1  
AEW45129.1  
AEW45198.1  
AEW45443.1  
AEW45735.2  
AEW45788.1  
AEW45073.2  
AEW45079.1  
AEW45126.1  
AEW45170.1  
AEW45439.1  
AEW45530.1  
AEW45094.1  
AEW45098.1  
AEW45114.1  
AEW45117.1  
AEW45131.1  
AEW45132.1  
AEW45588.2  
AEW45610.1  
AEW45762.1  
AEW45768.1  
AEW45783.1  
AEW45164.1  
AEW45577.1  
AEW45736.1  
AEW45742.1  
AEW45121.1  
AEW45177.1

AEW45734.1  
AEW45840.1  
AEW45091.1  
AEW45118.1  
AEW45434.1  
AEW45741.1  
AEW45074.1  
AEW45081.1  
AEW45082.1  
AEW45088.1  
AEW45110.2  
AEW45809.1  
AEW45075.1  
AEW45089.1  
AEW45127.1  
AEW45210.1  
AEW45496.2  
AEW45543.2  
AEW45583.1  
AEW45615.1  
AEW45837.1  
AEW45860.1  
AEW45077.1  
AEW45113.1  
AEW45135.1  
AEW45200.1  
AEW45455.1  
AEW45858.1  
AEW45096.1  
AEW45097.1  
AEW45099.1  
AEW45147.1  
AEW45165.1  
AEW45784.1  
AEW45807.1  
AEW45019.1  
AEW45076.1  
AEW45080.1  
AEW45125.1  
AEW45437.1  
AEW45534.1  
AEW45584.1  
AEW45743.1  
AEW45093.1  
AEW45138.1  
AEW45157.1  
AEW45167.1  
AEW45302.1  
AEW45737.1  
AEW45740.1  
AEW45769.1  
AEW45794.1  
AEW45100.1  
AEW45176.1  
AEW45188.1

AEW45435.2  
AEW45506.1  
AEW45789.1  
AEW45856.1  
AEW45012.1  
AEW45020.1  
AEW45078.1  
AEW45141.2  
AEW45515.1  
AEW45827.1  
AEW45033.1  
AEW45084.1  
AEW45152.1  
AEW45236.1  
AEW45285.1  
AEW45363.1  
AEW45787.1  
AEW45797.1  
AEW45851.1  
AEW45876.1  
AEW45009.1  
AEW45027.1  
AEW45211.1  
AEW45213.1  
AEW45216.1  
AEW45242.1  
AEW45522.1  
AEW45590.1  
AEW45763.1  
AEW45774.2  
AEW45780.1  
AEW45798.1  
AEW45830.1  
AEW45853.1  
AEW45855.1  
AEW45021.1  
AEW45032.2  
AEW45034.1  
AEW45036.1  
AEW45139.1  
AEW45149.1  
AEW45160.1  
AEW45185.1  
AEW45205.1  
AEW45231.1  
AEW45243.1  
AEW45249.1  
AEW45261.2  
AEW45281.1  
AEW45348.1  
AEW45535.1  
AEW45680.1  
AEW45839.1  
AEW45857.1  
AEW45015.1

AEW45024.1  
AEW45035.2  
AEW45038.1  
AEW45083.1  
AEW45128.1  
AEW45192.1  
AEW45240.1  
AEW45255.1  
AEW45260.1  
AEW45268.1  
AEW45299.1  
AEW45300.1  
AEW45354.1  
AEW45433.2  
AEW45442.1  
AEW45495.2  
AEW45544.1  
AEW45582.2  
AEW45759.1  
AEW45852.1  
AEW45018.1  
AEW45092.1  
AEW45140.1  
AEW45182.2  
AEW45214.1  
AEW45219.1  
AEW45247.1  
AEW45304.1  
AEW45492.1  
AEW45497.1  
AEW45524.1  
AEW45565.1  
AEW45689.1  
AEW45791.1  
AEW45835.1  
AEW45872.1  
AEW45014.1  
AEW45023.1  
AEW45194.1  
AEW45195.1  
AEW45218.1  
AEW45226.1  
AEW45276.1  
AEW45428.1  
AEW45512.1  
AEW45568.1  
AEW45585.1  
AEW45597.1  
AEW45785.1  
AEW45819.1  
AEW45826.1  
AEW45028.1  
AEW45104.1  
AEW45105.1  
AEW45106.1

AEW45146.1  
AEW45186.1  
AEW45208.1  
AEW45230.1  
AEW45504.1  
AEW45511.1  
AEW45563.2  
AEW45570.1  
AEW45579.1  
AEW45591.1  
AEW45658.1  
AEW45661.2  
AEW45795.1  
AEW45800.1  
AEW45011.1  
AEW45122.1  
AEW45220.1  
AEW45234.1  
AEW45250.1  
AEW45352.1  
AEW45454.1  
AEW45502.1  
AEW45508.2  
AEW45532.2  
AEW45552.1  
AEW45592.2  
AEW45777.1  
AEW45793.1  
AEW45838.1  
AEW45039.1  
AEW45102.1  
AEW45119.1  
AEW45161.2  
AEW45221.1  
AEW45239.1  
AEW45313.1  
AEW45483.1  
AEW45519.1  
AEW45587.1  
AEW45612.2  
AEW45761.1  
AEW45771.1  
AEW45775.1  
AEW45778.2  
AEW45842.1  
AEW45004.1  
AEW45168.1  
AEW45204.1  
AEW45223.1  
AEW45229.1  
AEW45246.1  
AEW45248.1  
AEW45267.1  
AEW45287.1  
AEW45305.1

AEW45332.1  
AEW45333.1  
AEW45353.1  
AEW45359.2  
AEW45523.1  
AEW45545.1  
AEW45554.1  
AEW45578.1  
AEW45596.1  
AEW45667.1  
AEW45767.1  
AEW45773.1  
AEW45782.1  
AEW45806.1  
AEW45859.1  
AEW45890.1  
AEW45143.1  
AEW45145.1  
AEW45189.1  
AEW45207.1  
AEW45217.2  
AEW45253.2  
AEW45254.1  
AEW45256.1  
AEW45289.1  
AEW45298.1  
AEW45301.1  
AEW45362.2  
AEW45493.1  
AEW45517.1  
AEW45531.1  
AEW45562.1  
AEW45573.1  
AEW45602.1  
AEW45616.1  
AEW45687.1  
AEW45810.2  
AEW45854.1  
AEW45885.1  
AEW45022.1  
AEW45115.1  
AEW45159.1  
AEW45180.1  
AEW45212.1  
AEW45241.1  
AEW45269.2  
AEW45283.1  
AEW45326.1  
AEW45452.1  
AEW45479.1  
AEW45560.1  
AEW45572.1  
AEW45593.1  
AEW45598.1  
AEW45611.1

AEW45628.1  
AEW45684.1  
AEW45765.1  
AEW45829.1  
AEW45849.1  
AEW45877.1  
AEW45003.2  
AEW45190.1  
AEW45197.2  
AEW45232.1  
AEW45244.1  
AEW45271.1  
AEW45472.1  
AEW45550.1  
AEW45569.1  
AEW45595.1  
AEW45601.1  
AEW45627.1  
AEW45770.1  
AEW45882.1  
AEW45889.1  
AEW45103.1  
AEW45178.1  
AEW45224.1  
AEW45252.1  
AEW45257.1  
AEW45259.1  
AEW45286.2  
AEW45318.1  
AEW45429.1  
AEW45445.1  
AEW45490.1  
AEW45513.1  
AEW45516.1  
AEW45520.1  
AEW45527.1  
AEW45546.2  
AEW45555.1  
AEW45613.1  
AEW45655.2  
AEW45656.1  
AEW45657.1  
AEW45678.1  
AEW45801.2  
AEW45868.1  
AEW45871.1  
AEW45144.1  
AEW45163.1  
AEW45187.1  
AEW45319.1  
AEW45427.1  
AEW45440.1  
AEW45471.1  
AEW45499.1  
AEW45528.1

AEW45561.1  
AEW45567.1  
AEW45571.1  
AEW45574.1  
AEW45580.1  
AEW45600.1  
AEW45609.1  
AEW45617.1  
AEW45008.1  
AEW45148.1  
AEW45153.1  
AEW45172.1  
AEW45175.1  
AEW45225.1  
AEW45436.1  
AEW45505.1  
AEW45510.1  
AEW45514.1  
AEW45521.1  
AEW45529.1  
AEW45553.2  
AEW45566.1  
AEW45589.1  
AEW45623.1  
AEW45631.1  
AEW45634.1  
AEW45688.1  
AEW45764.1  
AEW45772.1  
AEW45790.1  
AEW45844.1  
AEW45883.1  
AEW45884.1  
AEW45030.1  
AEW45171.1  
AEW45196.1  
AEW45321.1  
AEW45355.2  
AEW45426.1  
AEW45453.1  
AEW45501.1  
AEW45518.1  
AEW45526.1  
AEW45576.1  
AEW45618.1  
AEW45668.1  
AEW45766.1  
AEW45776.1  
AEW45850.1  
AEW45865.1  
AEW45867.1  
AEW45880.1  
AEW45010.1  
AEW45046.1  
AEW45150.1



AEW45151.1  
AEW45277.1  
AEW45278.1  
AEW45303.1  
AEW45451.1  
AEW45491.1  
AEW45525.1  
AEW45564.1  
AEW45586.1  
AEW45594.1  
AEW45599.1  
AEW45760.1  
AEW45786.1  
AEW45792.1  
AEW45825.1  
AEW45154.1  
AEW45290.1  
AEW45475.1  
AEW45548.1  
AEW45659.1  
AEW45679.1  
AEW45779.1  
AEW45881.1  
AEW45888.1  
AEW45201.1  
AEW45258.1  
AEW45476.1  
AEW45494.1  
AEW45660.1  
AEW45686.1  
AEW45173.1  
AEW45803.2  
AEW45280.1  
AEW45292.2  
AEW45329.1  
AEW45558.2  
AEW45832.1  
AEW45507.1  
AEW45575.1  
AEW45635.1  
AEW45796.1  
AEW45886.1  
AEW45017.1  
AEW45270.1  
AEW45320.1  
AEW45328.1  
AEW45509.1  
AEW45044.1  
AEW45006.1  
AEW45041.1  
AEW45215.1  
AEW45311.1  
AEW45498.1  
AEW45025.1  
AEW45758.1

AEW45013.1  
AEW45685.1  
AEW45820.1  
AEW45288.1  
AEW45005.1  
AEW45016.1  
AEW45040.1  
AEW45861.1  
AEW45828.1  
AEW45804.1  
AEW45781.1  
AEW45808.1  
AEW45836.1  
AEW45799.1  
AEW45833.1  
AEW45831.1  
AEW45841.2  
AEW45581.1  
AEW45533.1  
AEW45614.1  
AEW45090.1  
AEW45087.1  
AEW45551.1  
AEW45843.1  
AEW45500.1  
AEW45085.1

Family 2, 53 genes

---

AEW45340.1  
AEW45557.1  
AEW45360.1  
AEW45365.2  
AEW45537.1  
AEW45539.1  
AEW45541.1  
AEW45337.1  
AEW45339.2  
AEW45364.1  
AEW45367.2  
AEW45338.1  
AEW45536.1  
AEW45556.1  
AEW45341.1  
AEW45538.1  
AEW45357.2  
AEW45540.1  
AEW45347.2  
AEW45484.1  
AEW45343.1  
AEW45263.1  
AEW45361.2  
AEW45227.1  
AEW45606.1  
AEW45351.2

AEW45358.2  
AEW45604.1  
AEW45349.1  
AEW45265.1  
AEW45608.1  
AEW45356.1  
AEW45605.1  
AEW45264.1  
AEW45345.1  
AEW45603.1  
AEW45262.1  
AEW45266.1  
AEW45350.1  
AEW45191.1  
AEW45206.1  
AEW45342.1  
AEW45209.1  
AEW45346.1  
AEW45228.1  
AEW45607.2  
AEW45203.1  
AEW45179.1  
AEW45312.2  
AEW45322.1  
AEW45316.1  
AEW45181.1  
AEW45183.1

Family 3, 25 genes

---

AEW45664.1  
AEW45697.1  
AEW45706.1  
AEW45459.1  
AEW45654.1  
AEW45465.1  
AEW45690.1  
AEW45462.1  
AEW45677.1  
AEW45693.1  
AEW45675.1  
AEW45431.2  
AEW45666.1  
AEW45670.1  
AEW45486.1  
AEW45701.1  
AEW45310.2  
AEW45708.1  
AEW45461.2  
AEW45702.2  
AEW45665.1  
AEW45705.1  
AEW45676.2  
AEW45682.1  
AEW45683.1

Family 4, 18 genes

---

AEW45644.2  
AEW45643.1  
AEW45640.1  
AEW45481.1  
AEW45639.1  
AEW45646.1  
AEW45845.2  
AEW45648.1  
AEW45645.1  
AEW45641.1  
AEW45647.1  
AEW45673.1  
AEW45811.1  
AEW45649.1  
AEW45813.1  
AEW45662.2  
AEW45671.1  
AFM45085.1

Family 5, 18 genes

---

AEW45029.1  
AEW45814.2  
AEW45458.1  
AEW45470.1  
AEW45691.1  
AEW45707.1  
AEW45456.1  
AEW45669.1  
AEW45695.1  
AEW45824.1  
AEW45822.1  
AEW45674.1  
AEW45704.1  
AEW45466.1  
AEW45698.2  
AEW45468.1  
AEW45696.1  
AEW45703.1

Family 6, 14 genes

---

AEW45413.2  
AEW45405.1  
AEW45407.1  
AEW45408.1  
AEW45409.1  
AEW45415.1  
AEW45403.1  
AEW45411.1  
AEW45402.1  
AEW45410.1

AEW45401.1  
AEW45414.1  
AEW45412.1  
AEW45404.2

Family 7, 12 genes

---

AEW45626.2  
AEW45642.1  
AEW45625.1  
AEW45636.1  
AEW45622.1  
AEW45633.1  
AEW45632.1  
AEW45629.1  
AEW45630.1  
AEW45621.1  
AEW45620.1  
AFM45088.1

Family 8, 9 genes

---

AEW45377.2  
AEW45480.1  
AEW45460.1  
AEW45457.1  
AEW45672.1  
AEW45482.1  
AEW45823.1  
AEW45694.1  
AEW45812.1

Family 9, 8 genes

---

AEW45136.1  
AEW45133.2  
AEW45130.1  
AEW45134.1  
AEW45237.1  
AEW45155.1  
AEW45158.1  
AEW45238.1

Family 10, 6 genes

---

AEW45372.2  
AEW45334.1  
AEW45330.1  
AEW45293.1  
AEW45732.1  
AEW45370.2

Family 11, 5 genes

---

AEW45331.1

AEW45373.1  
AEW45294.1  
AEW45295.1  
AFM45077.1

Family 12, 5 genes

---

AEW45284.2  
AEW45222.1  
AEW45142.1  
AEW45251.2  
AEW45376.1

Family 13, 5 genes

---

AEW45485.1  
AEW45430.1  
AEW45327.1  
AEW45325.2  
AEW45282.1

Family 14, 4 genes

---

AEW45450.2  
AEW45423.1  
AEW45425.1  
AEW45449.2

Family 15, 4 genes

---

AEW45879.1  
AEW45887.1  
AEW45862.1  
AEW45864.1

Family 16, 4 genes

---

AEW45042.1  
AEW45026.1  
AEW45007.1  
AEW45045.1

Family 17, 4 genes

---

AEW45446.1  
AEW45619.1  
AEW45273.1  
AEW45624.1

Family 18, 4 genes

---

AEW45166.1  
AEW45169.1  
AEW45162.2  
AEW45681.1

Family 19, 3 genes

---

AEW45057.1  
AEW45058.2  
AFM45072.1

Family 20, 3 genes

---

AEW45869.1  
AEW45866.1  
AEW45002.1

Family 21, 3 genes

---

AEW45174.1  
AEW45272.1  
AEW45123.1

Family 22, 3 genes

---

AEW45317.1  
AEW45464.1  
AEW45692.1

Families of 2 gene members (12 families)

---

AEW45385.1  
AEW45384.1

AEW45873.1  
AEW45874.2

AEW45417.1  
AEW45406.2

AEW44918.1  
AEW44919.1

AEW45421.1  
AEW45369.1

AEW44969.1  
AEW44968.1

AEW45487.1  
AEW45309.1

AEW45821.1  
AEW45818.1

AEW45031.1  
AFM45091.1

AEW45296.1

AEW45374.1

AEW45738.1

AEW45733.1

AEW45314.1

AEW45324.1

---

\*The assignment of paralogous gene families was performed using BLASTclust tool provided by Max-Planck Institute for Developmental Biology, with 70% covered length and 30% sequence identity thresholds.

GenBank accession numbers are provided.
