# Supplementary material for: Mycoplasma haemocanis – the canine hemoplasma and its feline counterpart in the genomic era
Source: PubMed Central journal article supplement (PMC3496576; doi:10.1186/1297-9716-43-66), 2012-09-28
Supplement: 1297-9716-43-66-S2.pdf [file 1297-9716-43-66-S2.pdf]

**Supplementary Table 2. Analyses of the unique protein coding sequences (CDSs) of *Mycoplasma haemocanis* strain Illinois and *M. haemofelis* strain Ohio2.**

| <i>M. haemocanis</i> str. Illinois unique CDSs | Role category (TIGR microbial role categories)                                                                  | Molecular Function Terms <sup>a</sup>                                               | Biological Process Terms <sup>a</sup>                                                                                                                              | Cellular Component Terms <sup>a</sup>                 | Internal Helix <sup>b</sup> | Non-Cytoplasmic (signal peptide) <sup>b</sup> | Subcellular Localization <sup>b</sup> | GenBank Accession Number |            |
|------------------------------------------------|-----------------------------------------------------------------------------------------------------------------|-------------------------------------------------------------------------------------|--------------------------------------------------------------------------------------------------------------------------------------------------------------------|-------------------------------------------------------|-----------------------------|-----------------------------------------------|---------------------------------------|--------------------------|------------|
| Paralogous family 9                            | hypothetical protein                                                                                            | ion/voltage-gated chloride channel activity (41%)                                   | ion/chloride transport (41%)                                                                                                                                       | membrane (42%)                                        | 1                           | no                                            | cytoplasmic membrane                  | AEW45130.1               |            |
|                                                | hypothetical protein                                                                                            | catalytic activity (35%)                                                            | metabolic process (35%)                                                                                                                                            | cytoplasm (21%)                                       | 1                           | no                                            | unknown                               | AEW45133.1               |            |
|                                                | hypothetical protein                                                                                            | transferase (33%)                                                                   | transport (30%)                                                                                                                                                    | cytoplasm (53%)                                       | 1                           | no                                            | cytoplasmic membrane                  | AEW45134.1               |            |
|                                                | hypothetical protein                                                                                            | nucleotide/ATP binding (39%)                                                        | metabolic process (32%)                                                                                                                                            | cytoplasm (37%)                                       | 1                           | no                                            | unknown                               | AEW45136.1               |            |
|                                                | hypothetical protein                                                                                            | catalytic activity (51%)                                                            | GTP metabolic process (32%)                                                                                                                                        | cytoplasm (67%)                                       | 1                           | no                                            | unknown                               | AEW45155.1               |            |
|                                                | hypothetical protein                                                                                            | ATP binding (39%)                                                                   | carbohydrate metabolic process (37%)                                                                                                                               | cytoplasm (28%)                                       | 1                           | no                                            | unknown                               | AEW45158.1               |            |
|                                                | hypothetical protein                                                                                            | nucleotide binding (37%)                                                            | metabolic process (24%)                                                                                                                                            | ribosome (32%)/cytoplasm (24%)                        | 1                           | no                                            | cytoplasmic membrane                  | AEW45237.1               |            |
|                                                | hypothetical protein                                                                                            | electron carrier activity (38%)/oxidoreductase activity (38%)                       | fumarate metabolic process (22%)                                                                                                                                   | membrane (46%)<br>cytoplasm (20%)/extracellular (19%) | 1                           | no                                            | unknown                               | AEW45238.1               |            |
| Not in paralogous families                     | hypothetical protein                                                                                            | ATP binding (39%)                                                                   | cell adhesion (19%)<br>two-component signal transduction system (46%)/<br>regulation of transcription, DNA-dependent (46%)/<br>response to hydrogen peroxide (46%) | membrane (53%)                                        | 0                           | no                                            | cytoplasmic membrane                  | AEW45062.1               |            |
|                                                | hypothetical protein                                                                                            | protein binding (46%)/ two-component response regulator activity (46%)              | DNA metabolic process/DNA topological change (100%)                                                                                                                | chromosome (100%)                                     | 2                           | no                                            | cytoplasmic membrane                  | AEW45815.1               |            |
|                                                | hypothetical protein                                                                                            | nucleotide/ATP binding (100%)                                                       | ATP biosynthetic process (22%)                                                                                                                                     | membrane (70%)                                        | 1                           | no                                            | cytoplasmic membrane                  | AEW45816.1               |            |
|                                                | hypothetical protein                                                                                            | ATP binding (37%)                                                                   | polysaccharide catabolic process (71%)                                                                                                                             | membrane (71%)                                        | 1                           | no                                            | unknown                               | AEW45817.1               |            |
|                                                | hypothetical protein                                                                                            | oxidoreductase activity/catalytic activity (42%)                                    | transport (53%)                                                                                                                                                    | membrane (53%)                                        | 1                           | no                                            | unknown                               | AEW45917.1               |            |
|                                                | hypothetical protein                                                                                            | methyltransferase (68%)                                                             | rRNA modification (37%)                                                                                                                                            | cytoplasm (30%)                                       | 0                           | no                                            | unknown                               | AEW46011.1               |            |
|                                                | hypothetical protein                                                                                            | N.A.*                                                                               | N.A.*                                                                                                                                                              | N.A.*                                                 | 0                           | no                                            | unknown                               | AEW45323.1.1             |            |
|                                                | hypothetical protein                                                                                            | N.A.*                                                                               | N.A.*                                                                                                                                                              | N.A.*                                                 | 0                           | no                                            | unknown                               | AEW45878.1               |            |
|                                                | CDSs with predicted function (present in other bacteria species, but absent in <i>M. haemofelis</i> str. Ohio2) | 50S ribosomal protein L33 phosphotransferase system glucose-specific IIBC component | structural constituent of ribosome (100%)                                                                                                                          | translation (100%)                                    | ribosome (100%)             | 0                                             | no                                    | unknown                  | AEW45065.1 |
|                                                |                                                                                                                 | 30S ribosomal protein S14 type Z                                                    | sugar:hydrogen symporter activity (100%)                                                                                                                           | transport (100%)                                      | membrane (100%)             | 7                                             | no                                    | cytoplasmic membrane     | AEW45748.1 |
|                                                |                                                                                                                 | structural constituent of ribosome (100%)                                           | translation (100%)                                                                                                                                                 | ribosome (100%)                                       | 0                           | no                                            | cytoplasmic                           | AEW45925.1               |            |
| <i>M. haemofelis</i> str. Ohio2 unique CDSs    | Role category (TIGR microbial role categories)                                                                  | Molecular Function Terms <sup>a</sup>                                               | Biological Process Terms <sup>a</sup>                                                                                                                              | Cellular Component Terms <sup>a</sup>                 | Internal Helix <sup>b</sup> | Non-Cytoplasmic (signal peptide) <sup>b</sup> | Subcellular Localization <sup>b</sup> | GenBank Accession Number |            |
| Paralogous family 8                            | hypothetical protein                                                                                            | metal ion binding/DNA binding (80%)                                                 | DNA integration (80%)                                                                                                                                              | N.I.*                                                 | 1                           | no                                            | unknown                               | AEG72490.1               |            |
|                                                | hypothetical protein                                                                                            | hydrolase (20%)                                                                     | lipid metabolism (20%)                                                                                                                                             | membrane (42%)                                        | 1                           | no                                            | cytoplasmic                           | AEG72498.1               |            |
|                                                | hypothetical protein                                                                                            | signal transducer activity/receptor activity (54%)                                  | signal transduction (54%)                                                                                                                                          | membrane (56%)                                        | 1                           | no                                            | unknown                               | AEG72503.1               |            |
|                                                | hypothetical protein                                                                                            | transferase (19%)                                                                   | transport (18%)                                                                                                                                                    | membrane (35%)                                        | 1                           | yes                                           | extracellular                         | AEG73680.1               |            |
|                                                | hypothetical protein                                                                                            | nucleic acid binding (19%)                                                          | biological process (13%)                                                                                                                                           | membrane (40%)                                        | 1                           | no                                            | cytoplasmic                           | AEG72504.1               |            |
|                                                | hypothetical protein                                                                                            | N.A.*                                                                               | transport (91%)                                                                                                                                                    | chromosome (91%)                                      | 1                           | no                                            | cytoplasmic                           | AEG73619.1               |            |
|                                                | hypothetical protein                                                                                            | nucleic acid binding (39%)/ hydrolase (39%)                                         | mRNA processing (39%)                                                                                                                                              | chromosome (72%)                                      | 1                           | no                                            | unknown                               | AEG73558.1               |            |
|                                                | hypothetical protein                                                                                            | electron carrier activity (28%)/ heme binding (28%)                                 | transport (28%)                                                                                                                                                    | membrane (24%)                                        | 1                           | no                                            | unknown                               | AEG73559.1               |            |
| Paralogous family 11                           | hypothetical protein                                                                                            | catalytic activity (36%)/ metal ion binding (36%)                                   | cell adhesion (23%)                                                                                                                                                | membrane (27%)                                        | 1                           | no                                            | unknown                               | AEG72489.1               |            |
|                                                | hypothetical protein                                                                                            | nucleic acid binding (41%)/ hydrolase (41%)                                         | DNA repair (37%)                                                                                                                                                   | chromosome (52%)                                      | 1                           | no                                            | unknown                               | AEG72502.1               |            |
|                                                | hypothetical protein                                                                                            | heat shock protein binding (49%)                                                    | protein transport across membrane (49%)                                                                                                                            | membrane (41%)                                        | 1                           | yes                                           | unknown                               | AEG72495.1               |            |
|                                                | hypothetical protein                                                                                            | ion/voltage-gated chloride channel activity (35%)                                   | transport (45%)                                                                                                                                                    | membrane (53%)                                        | 1                           | yes                                           | unknown                               | AEG72501.1               |            |
| Paralogous family 12                           | hypothetical protein                                                                                            | protein binding (25%)                                                               | protein transport (38%)                                                                                                                                            | cytoplasm (38%)                                       | 1                           | yes                                           | unknown                               | AEG72499.1               |            |
|                                                | hypothetical protein                                                                                            | protein binding (42%)                                                               | protein localization (26%)                                                                                                                                         | cytoplasm (56%)                                       | 1                           | yes                                           | unknown                               | AEG73634.1               |            |
|                                                | hypothetical protein                                                                                            | nucleotide/ATP binding (45%)                                                        | translation (20%)                                                                                                                                                  | cytoplasm (27%)<br>membrane (28%) / cytoplasm         | 1                           | yes                                           | extracellular                         | AEG73653.1               |            |
|                                                | hypothetical protein                                                                                            | nucleic acid binding (29%)                                                          | DNA catabolic process (15%)<br>regulation of transcription (22%) / DNA recombination/integration (20%)                                                             | chromosome (43%)                                      | 0                           | no                                            | unknown                               | AEG73589.1               |            |
|                                                | hypothetical protein                                                                                            | catalytic activity (32%)/ DNA binding (32%)                                         | regulation of transcription (34%)                                                                                                                                  | chromosome (34%)                                      | 0                           | yes                                           | unknown                               | AEG73145.1               |            |
|                                                | hypothetical protein                                                                                            | metal ion binding (55%)                                                             | transcription (26%)                                                                                                                                                | cytoplasm (40%)                                       | 0                           | no                                            | unknown                               | AEG73146.1               |            |
| Paralogous family 14.2                         | hypothetical protein                                                                                            | DNA binding (37%)                                                                   | regulation of transcription (37%) and replication (35%)                                                                                                            | host cell nucleus (35%) / chromosome (34%)            | 1                           | no                                            | unknown                               | AEG73144.1               |            |
|                                                | hypothetical protein                                                                                            | RNA binding (74%)                                                                   | RNA processing (64%)                                                                                                                                               | cytoplasm (25%)                                       | 1                           | no                                            | unknown                               | AEG73227.1               |            |
| Paralogous family 15.2                         | hypothetical protein                                                                                            | nucleotide/ATP binding (27%)                                                        | transport (26%)                                                                                                                                                    | membrane (59%)                                        | 1                           | no                                            | unknown                               | AEG73223.1               |            |
|                                                | hypothetical protein                                                                                            | transferase (58%)                                                                   | spermidine catabolic process (34%)                                                                                                                                 | membrane (29%)                                        | 1                           | no                                            | unknown                               | AEG72719.1               |            |
|                                                | hypothetical protein                                                                                            | metal ion binding (56%)                                                             | protein amino acid phosphorylation (28%)                                                                                                                           | cytoplasm (50%)                                       | 1                           | no                                            | unknown                               | AEG72717.1               |            |
| Not in paralogous families                     | hypothetical protein                                                                                            | DNA binding (38%)                                                                   | DNA repair/recombination (37%)                                                                                                                                     | intracellular (44%)                                   | 0                           | no                                            | cytoplasmic membrane                  | AEG72934.1               |            |
|                                                | hypothetical protein                                                                                            | hydrolase (30%)/ protein binding (22%)                                              | regulation of transcription (21%) / pathogenesis (10%)                                                                                                             | chromosome (31%) / membrane (22%)                     | 1                           | yes                                           | unknown                               | AEG72464.1               |            |
|                                                | hypothetical protein                                                                                            | nucleotide binding (43%)                                                            | regulation of transcription (34%)                                                                                                                                  | membrane (42%) / chromosome (28%)                     | 0                           | no                                            | cytoplasmic                           | AEG73312.1               |            |
|                                                | hypothetical protein                                                                                            | catalytic activity (28%) / ATP binding (28%)                                        | viral reproduction (69%)                                                                                                                                           | N.A.*                                                 | 2                           | no                                            | cytoplasmic membrane                  | AEG73767.1               |            |
|                                                | hypothetical protein                                                                                            | translation release factor activity (24%)                                           | translational termination (24%)                                                                                                                                    | membrane (42%)                                        | 1                           | yes                                           | unknown                               | AEG72694.1               |            |
|                                                | hypothetical protein                                                                                            | signal transducer activity (59%) / receptor activity (59%)                          | signal transduction (60%)                                                                                                                                          | membrane (90%)                                        | 2                           | no                                            | cytoplasmic membrane                  | AEG72554.1               |            |
|                                                | hypothetical protein                                                                                            | metalloendopeptidase activity (34%) / metal ion binding (34%)                       | proteolysis (34%) / pathogenesis (17%)                                                                                                                             | extracellular region (34%)                            | 0                           | no                                            | unknown                               | AEG73596.1               |            |
|                                                | hypothetical protein                                                                                            | metal ion binding (28%)                                                             | transport (18%)                                                                                                                                                    | membrane (50%)                                        | 2                           | no                                            | cytoplasmic membrane                  | AEG72923.1               |            |
|                                                | hypothetical protein                                                                                            | metal ion binding (43%) / DNA binding (35%)                                         | transcription (36%)                                                                                                                                                | cytoplasm (30%)                                       | 0                           | no                                            | cytoplasmic                           | AEG73063.1               |            |

|                                                                                                                      |                                                                        |                                                        |                                                                    |   |    |                      |            |
|----------------------------------------------------------------------------------------------------------------------|------------------------------------------------------------------------|--------------------------------------------------------|--------------------------------------------------------------------|---|----|----------------------|------------|
| hypothetical protein                                                                                                 | DNA binding (27%)                                                      | transcription (27%)                                    | membrane (51%)                                                     | 0 | no | unknown              | AEG73391.1 |
| hypothetical protein                                                                                                 | structural molecule activity (60%)                                     | transport (17%)/ cell adhesion (15%)                   | cytoplasm (63%)/ cytoskeleton (63%)                                | 1 | no | cytoplasmic membrane | AEG72824.1 |
| hypothetical protein                                                                                                 | nucleotide (49%)/ATP binding (31%)                                     | translation (17%)                                      | cytoplasm (36%)                                                    | 1 | no | cytoplasmic          | AEG73591.1 |
| hypothetical protein                                                                                                 | protein binding (36%)/ receptor activity (42%)                         | cell adhesion (31%)                                    | membrane (50%)                                                     | 1 | no | cytoplasmic          | AEG73116.1 |
| hypothetical protein                                                                                                 | metallopeptidase activity (20%)                                        | proteolysis (20%)                                      | membrane (54%)                                                     | 1 | no | cytoplasmic          | AEG73115.1 |
| hypothetical protein                                                                                                 | protein binding (32%)                                                  | phosphate transport (19%)/ cell adhesion (19%)         | cytoplasm (35%)                                                    | 1 | no | cytoplasmic          | AEG73114.1 |
| hypothetical protein                                                                                                 | RNA binding (99%)                                                      | evasion by virus of host immune response (99%)         | cytoplasm (99%)/ chromosome (99%)                                  | 3 | no | cytoplasmic membrane | AEG73017.1 |
| hypothetical protein                                                                                                 | catalytic activity (56%)/ transferase (44%)                            | metabolic process (48%)                                | membrane (100%)                                                    | 3 | no | cytoplasmic membrane | AEG72385.1 |
| hypothetical protein                                                                                                 | transaminase/isomerase (100%)                                          | porphyrin biosynthetic process (100%)                  | cytoplasm (100%)                                                   | 0 | no | cytoplasmic          | AEG72616.1 |
| hypothetical protein                                                                                                 | nucleotide binding (34%)/ translation initiation factor activity (32%) | translational initiation (32%)/ pathogenesis (20%)     | membrane (42%)                                                     | 1 | no | unknown              | AEG73324.1 |
| hypothetical protein                                                                                                 | N.A.*                                                                  | N.A.*                                                  | N.A.*                                                              | 2 | no | cytoplasmic membrane | AEG73429.1 |
| CDSs with predicted function (present in several bacteria species, but absent in <i>M. haemocanis</i> str. Illinois) | type II site-specific deoxyribonuclease                                | Type II site-specific deoxyribonuclease activity (83%) | DNA restriction-modification system (83%)                          | 0 | no | cytoplasmic          | AEG73510.1 |
|                                                                                                                      | Cytosine-specific methyltransferase                                    | DNA (cytosine-5-) methyltransferase activity (99%)     | DNA methylation (99%)/ DNA restriction-modification system (99%)   | 0 | no | unknown              | AEG73555.1 |
|                                                                                                                      | C-5 cytosine-specific DNA methylase                                    | DNA (cytosine-5-) methyltransferase activity (100%)    | DNA methylation (100%)/ DNA restriction-modification system (100%) | 0 | no | cytoplasmic          | AEG73509.1 |

<sup>a</sup> ESG software (sequence similarity-based function prediction) [36].

<sup>b</sup> prediction using PSORTb version 3 software [31].

\* N.A.: no function assigned by ESG software.
