# Supplementary material for: Mycoplasma haemocanis – the canine hemoplasma and its feline counterpart in the genomic era
Source: Vet Res. 2012 Sep 28;43(1):66. doi: 10.1186/1297-9716-43-66 (PMC3496576; doi:10.1186/1297-9716-43-66)
Supplement: Additional file 3 — Table S3. Tandem repeats* identified in the genome of Mycoplasma haemocanis strain Illinois. Complete list of variable tandem repeats, identified using Tandem repeats finder program, indicating their sequences and position in the genome of M. haemocanis. [file 1297-9716-43-66-S3.pdf]

**Supplementary Table 3. Tandem repeats\* identified in the genome of *Mycoplasma haemocanis* strain Illinois.**

[illegible]

\*TRDB - The Tandem Repeats Database, Nucleic Acids Research, 2006, Vol. 00, Database issue D1-D8 doi:10.1093/nar/gkl1013. Parameters: match, 2, mismatch, 7, indels, 2.

Mhc: *Mycoplasma haemocanis* strain Illinois
